# Supplementary material for: Ni-promoted MoS2 in hollow zeolite nanoreactors: enhanced catalytic activity and stability for deep hydrodesulfurization
Source: Royal Society of Chemistry journal article supplement (doi:10.1039/d2ta00034b), 2022-01-01
Supplement: d2ta00034b1.pdf [file d2ta00034b1.pdf]

**Supporting Information**

**Ni-promoted MoS<sub>2</sub> in Hollow Zeolite Nanoreactors: Enhanced  
Catalytic activity and stability for Deep Hydrodesulfurization**

Xin Kang, Dongxu Wang, Jiancong Liu\* Chungui Tian, He Xu, Jialu Xu and  
Honggang Fu\*

Key Laboratory of Functional Inorganic Material Chemistry, Ministry of Education of  
the People's Republic of China, Heilongjiang University. Harbin 150080, P. R. China.

Email: fuhg@hlju.edu.cn, fuhg@vip.sina.com, jiancong@gmail.com.

## **The content of ESI**

1. **Figure S1.** SEM images of ZSM-5 after NaOH aqueous solution treatment for different times: 0 min (a), 15 min (b), 45 min (c) and 60 min (d).
2. **Figure S2.** Wide-angle XRD of ZSM-5 zeolite with different alkaline solution treatment time (0 min, 15 min, 45 min and 60 min).
3. **Figure S3.** Pore size distribution of Hol-ZSM-5 zeolite
4. **Figure S4.** Pore size distribution of ZSM-5 zeolite
5. **Figure S5** The EDS mapping for Si and Mo elements in NiMoS<sub>x</sub>/Hol-ZSM-5 catalyst.
6. **Figure S6.** XPS survey spectra of the NiMoS<sub>x</sub>/Hol-ZSM-5 and NiMoS<sub>x</sub>/ZSM-5 catalysts. The NiMoS<sub>x</sub>/Hol-ZSM-5 catalyst EDS mapping for Si and Mo elements.
7. **Figure S7.** TEM images of NiMoS<sub>x</sub>/Hol-ZSM-5 catalyst after HDS catalysis testing for 80 h.
8. **Table S1.** Textural parameters of Hol-ZSM-5 and ZSM-5 supports.
9. **Table S2.** Ni 2p XPS spectra of NiMoS<sub>x</sub>/Hol-ZSM-5 and NiMoS<sub>x</sub>/ZSM-5 catalysts.
10. **Table S3.** Mo 3d XPS spectra of NiMoS<sub>x</sub>/Hol-ZSM-5 and NiMoS<sub>x</sub>/ZSM-5 catalysts.
11. **Table S4.** DBT HDS performance over NiMoS<sub>x</sub>/Hol-ZSM-5 and NiMoS<sub>x</sub>/ZSM-5 catalysts.

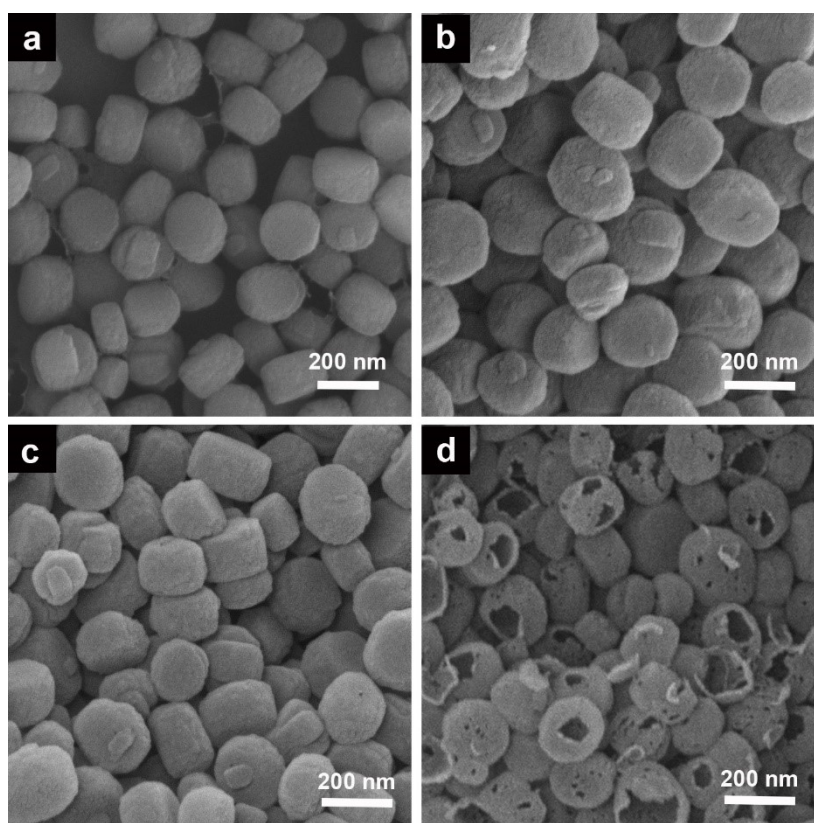

**Figure S1.** SEM images of ZSM-5 after 0.2 M NaOH aqueous solution treatment for different times: 0 min (a), 15 min (b), 45 min (c) and 60 min (d).

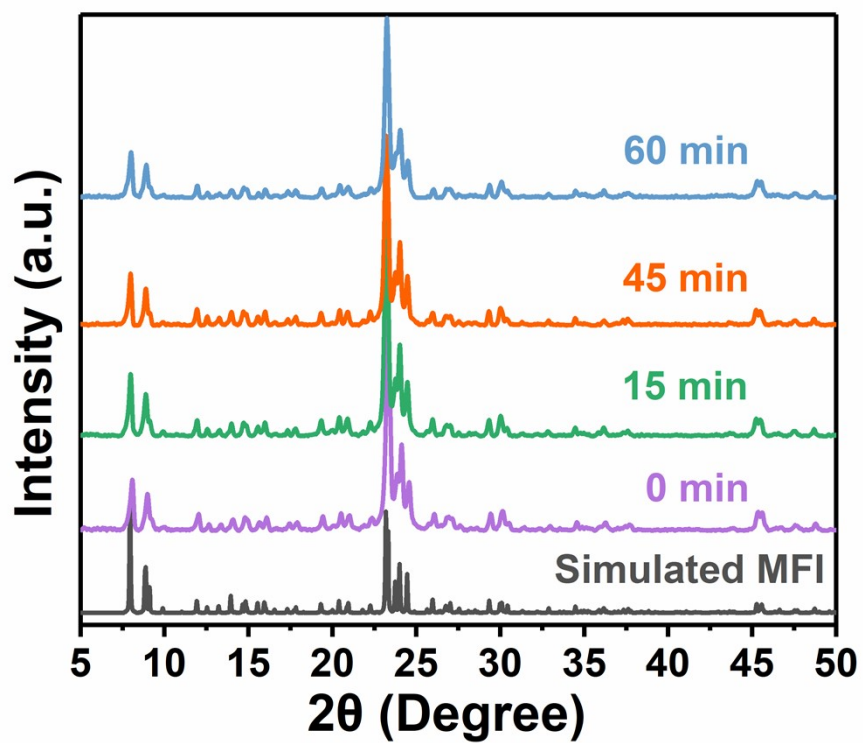

**Figure S2.** Wide-angle XRD of ZSM-5 zeolite with different alkaline solution treatment time (0 min, 15min, 45min and 60min).

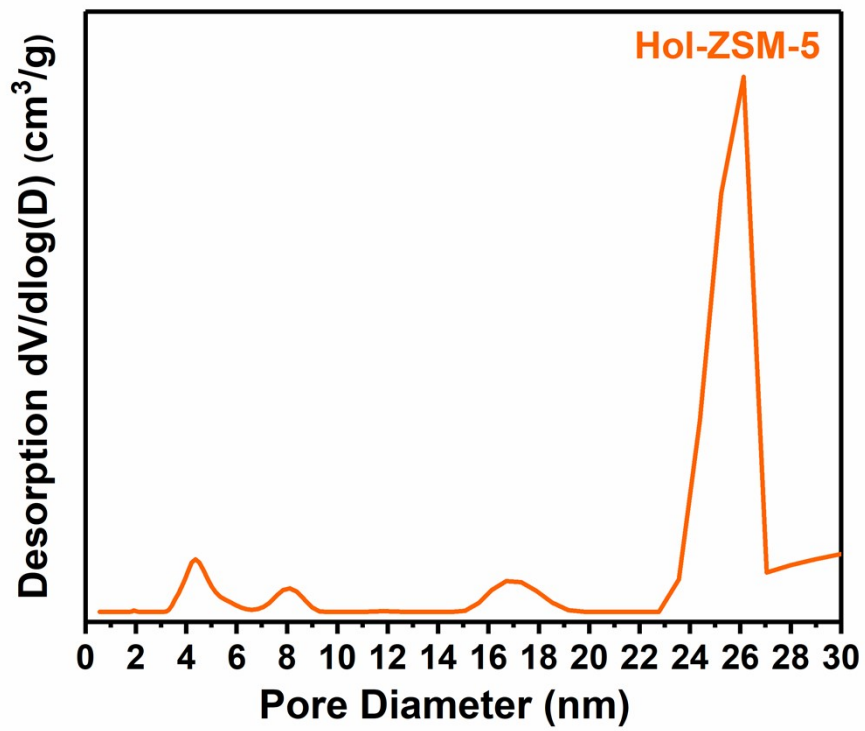

Figure S3. Pore size distribution of Hol-ZSM-5 zeolite

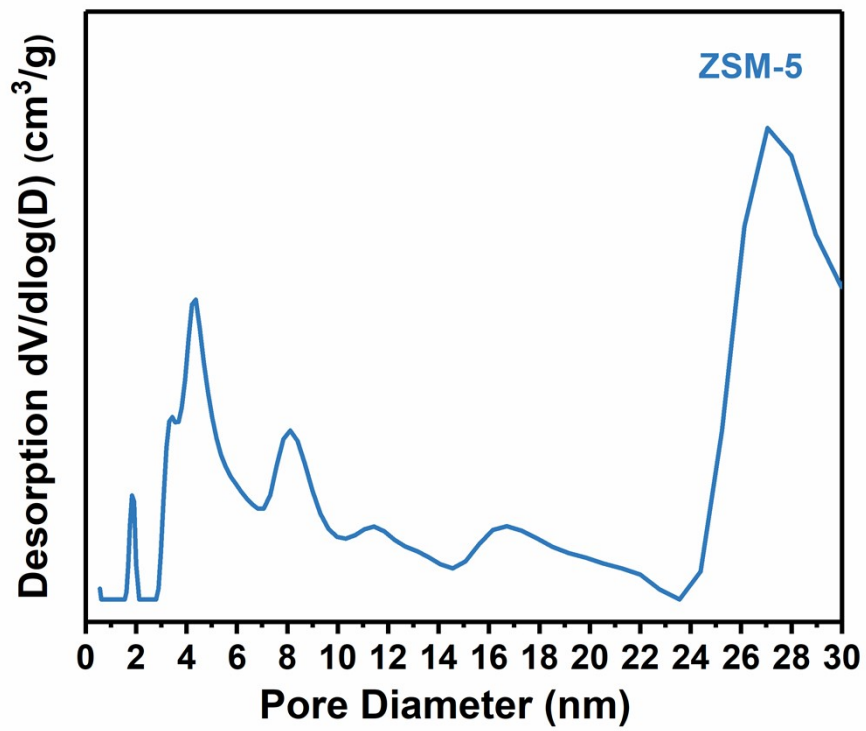

Figure S4. Pore size distribution of ZSM-5 zeolite

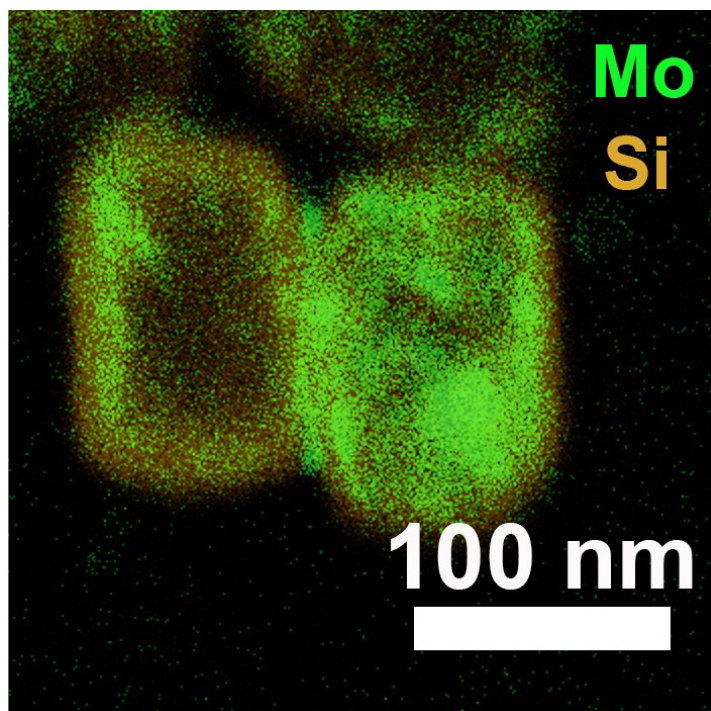

**Figure S5.** The EDS mapping for Si and Mo elements in NiMoS<sub>x</sub>/Hol-ZSM-5 catalyst.

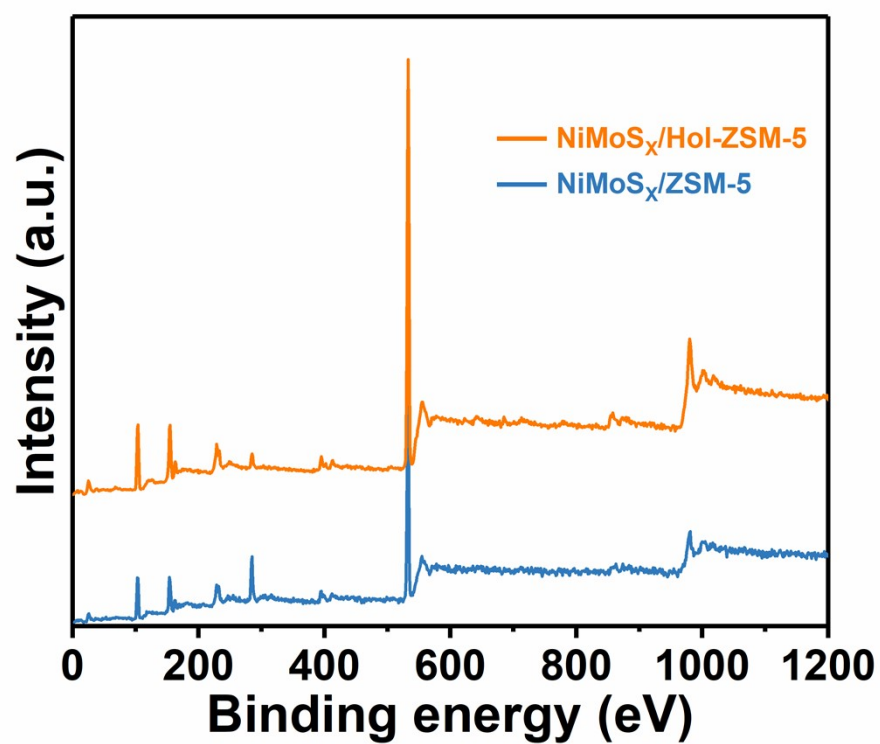

**Figure S6.** XPS survey spectra of the NiMoS<sub>x</sub>/Hol-ZSM-5 and NiMoS<sub>x</sub>/ZSM-5 catalysts.



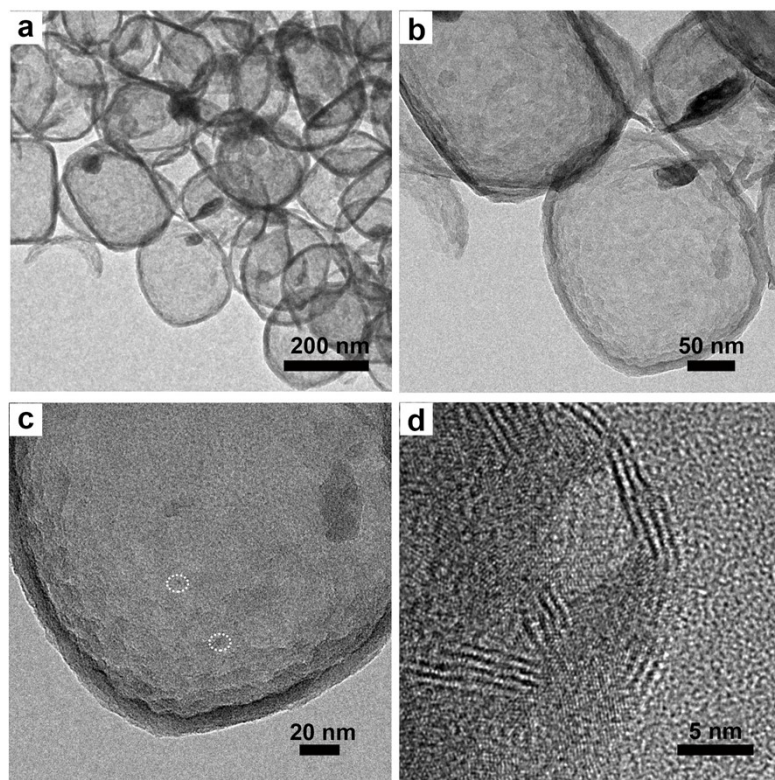

**Figure S7.** TEM images of NiMoS<sub>x</sub>/Hol-ZSM-5 catalyst after HDS catalysis testing for 80 h.

**Table S1.** Textural parameters of Hol-ZSM-5 and ZSM-5 supports.

| Sample    | $S_{\text{BET}}$<br>( $\text{m}^2\text{g}^{-1}$ ) <sup>a</sup> | $V_{\text{Total}}$<br>( $\text{cm}^3\text{g}^{-1}$ ) <sup>b</sup> | $V_{\text{Micro}}$<br>( $\text{cm}^3\text{g}^{-1}$ ) <sup>c</sup> | Average pore width<br>(nm) <sup>d</sup> |
|-----------|----------------------------------------------------------------|-------------------------------------------------------------------|-------------------------------------------------------------------|-----------------------------------------|
| ZSM-5     | 536.6                                                          | 0.614                                                             | 0.098                                                             | 0.56                                    |
| Hol-ZSM-5 | 332.4                                                          | 1.327                                                             | 0.033                                                             | 27.4                                    |

<sup>a</sup> BET Surface area

<sup>b</sup> Total pore volume,  $P/P_0 = 0.989$

<sup>c</sup> t-Plot method

<sup>d</sup> DFT pore diameter

**Table S2.** Ni 2p XPS spectra of NiMoS<sub>x</sub>/Hol-ZSM-5 and NiMoS<sub>x</sub>/ZSM-5 catalysts.

| Catalysts                     | NiS <sub>x</sub> |       | NiMoS <sub>x</sub> |       | NiO       |       |
|-------------------------------|------------------|-------|--------------------|-------|-----------|-------|
|                               | BE (eV)          | ar.%  | BE (eV)            | ar.%  | BE (eV)   | ar.%  |
| NiMoS <sub>x</sub> /Hol-ZSM-5 | 852.5±0.1        | 10.03 | 855.9±0.1          | 82.06 | 860.1±0.1 | 7.91  |
| NiMoS <sub>x</sub> /ZSM-5     | 852.5±0.1        | 10.62 | 855.9±0.1          | 73.36 | 860.1±0.1 | 16.02 |

**Table S3.** Mo 3d XPS spectra of NiMoS<sub>x</sub>/Hol-ZSM-5 and NiMoS<sub>x</sub>/ZSM-5 catalysts.

| Catalysts<br>BE (eV)          | Mo <sup>4+</sup> |               | Mo <sup>5+</sup> |               | Mo <sup>6+</sup> |               | S <sub>Mo</sub> <sup>b</sup> |
|-------------------------------|------------------|---------------|------------------|---------------|------------------|---------------|------------------------------|
|                               | ar.%             | ar.%          | ar.%             | ar.%          | ar.%             | ar.%          |                              |
|                               | 229.3<br>±0.1    | 232.3<br>±0.1 | 231.2<br>±0.1    | 234.6<br>±0.1 | 233.3<br>±0.1    | 236.3<br>±0.1 |                              |
| NiMoS <sub>x</sub> /Hol-ZSM-5 | 51.69            | 33.53         | 1.26             | 0.84          | 7.59             | 5.09          | 85.22%                       |
| NiMoS <sub>x</sub> /ZSM-5     | 45.07            | 27.32         | 14.26            | 10.31         | 2.28             | 0.76          | 72.39%                       |

<sup>a</sup> ar.% indicates the area percent of XPS peak. <sup>b</sup> S<sub>Mo</sub> = Mo<sub>sulfidation</sub> = Mo<sup>4+</sup>/(Mo<sup>4+</sup>+Mo<sup>5+</sup>+Mo<sup>6+</sup>)

**Table S4.** DBT HDS performance of NiMoS<sub>x</sub>/Hol-ZSM-5 and NiMoS<sub>x</sub>/ZSM-5 catalysts.

| Catalysts                     | Conversion <sup>a</sup> (%) | $k_{\text{HDS}}$ (mol·g <sup>-1</sup> ·s <sup>-1</sup> ) | Product selectivity <sup>b</sup> (%) |       |       | DDS/HYD ratio |
|-------------------------------|-----------------------------|----------------------------------------------------------|--------------------------------------|-------|-------|---------------|
|                               |                             |                                                          | HYD                                  |       | DDS   |               |
|                               |                             |                                                          | DCH                                  | CHB   | BP    |               |
| NiMoS <sub>x</sub> /Hol-ZSM-5 | 30.26                       | 18.74×10 <sup>-7</sup>                                   | 0.19                                 | 2.57  | 97.24 | 35.23         |
| NiMoS <sub>x</sub> /ZSM-5     | 29.89                       | 5.54×10 <sup>-7</sup>                                    | 2.25                                 | 17.46 | 80.29 | 4.74          |

<sup>a</sup>The DBT HDS conversion was obtained by changing the WHSV (330 °C, 4 MPa, hydrogen-oil ratio of 600).

<sup>b</sup>Definition at a total DBT conversion of 30% by changing the WHSV.
